# Supplementary material for: Safe and sound: examining the effect of a training targeting psychological safety and trust in peer assessment
Source: Frontiers journal article supplement (doi:10.3389/feduc.2023.1198011), 2023-06-16
Supplement: Data_Sheet_1.PDF [file Data_Sheet_1.PDF]

# Instrument to report the characteristics of peer assessment designs

Designed by Panadero, E., Alqassab, M., Fernández Ruiz, J., & Ocampo, J. C. (2023). A systematic review on peer assessment: Intrapersonal and interpersonal factors. *Assessment & Evaluation in Higher Education*. Use that citation if you include the instrument in your publication.

## TITLE OF THE ARTICLE

Safe and sound: Examining the effect of a training targeting psychological safety and trust in peer assessment

Authors

Morgane Senden, Dominique De Jaeger, & Liesje Coertjens

### Our study investigates:

- ☒ The impact of peer assessment on interpersonal/intrapersonal factors
- ☐ The impact of interpersonal/intrapersonal factors on peer assessment
- ☐ The impact of peer assessment on performance/behaviour
- ☐ The impact of moderator/mediator variables on peer assessment outcomes

### Describe the characteristics of your peer assessment study in the table below.

| Context              |                                      |                                                                                                                                                                                                                                                                          |
|----------------------|--------------------------------------|--------------------------------------------------------------------------------------------------------------------------------------------------------------------------------------------------------------------------------------------------------------------------|
| Category             | Description <sup>i</sup>             | Our study                                                                                                                                                                                                                                                                |
| <b>1</b>             | <b>Subject domain</b>                | Subject domain the study was done in (e.g., mathematics, instructional sciences, accounting, etc.)                                                                                                                                                                       |
|                      |                                      | Physical education (didactics of acrobatic sports)                                                                                                                                                                                                                       |
| <b>2</b>             | <b>Place/Time</b>                    | Where was the PA conducted?<br>(In class or out of class?)                                                                                                                                                                                                               |
|                      |                                      | <input type="checkbox"/> In class/class time<br><input checked="" type="checkbox"/> Out of class/free time                                                                                                                                                               |
| <b>3</b>             | <b>Setting</b>                       | Formal or informal education setting?                                                                                                                                                                                                                                    |
|                      |                                      | <input checked="" type="checkbox"/> Formal<br><input type="checkbox"/> Informal                                                                                                                                                                                          |
| <b>4</b>             | <b>Requirement</b>                   | Was PA compulsory or voluntary for assessor/assessee?                                                                                                                                                                                                                    |
|                      |                                      | <input checked="" type="checkbox"/> Compulsory<br><input type="checkbox"/> Voluntary                                                                                                                                                                                     |
| <b>5</b>             | <b>Alignment</b>                     | Was the PA activity aligned to curriculum, learning goals or teaching?                                                                                                                                                                                                   |
|                      |                                      | <input checked="" type="checkbox"/> Yes<br><input type="checkbox"/> No                                                                                                                                                                                                   |
| Instructional design |                                      |                                                                                                                                                                                                                                                                          |
| <b>6</b>             | <b>Purpose</b>                       | What was the assessment purpose of the PA activity? (Formative, summative or both?)                                                                                                                                                                                      |
|                      |                                      | <input type="checkbox"/> Formative<br><input type="checkbox"/> Summative<br><input checked="" type="checkbox"/> Both                                                                                                                                                     |
| <b>7</b>             | <b>Object</b>                        | What was assessed? (e.g., written assignment, oral presentation, contribution to group work)                                                                                                                                                                             |
|                      |                                      | Instruction sheet illustrating a gymnastic exercise                                                                                                                                                                                                                      |
| <b>8</b>             | <b>Product/Output</b>                | What was the output of the PA? (e.g., score, written feedback, oral feedback, or a combination)                                                                                                                                                                          |
|                      |                                      | Score (level in a rubric) and written feedback                                                                                                                                                                                                                           |
| <b>9</b>             | <b>Relation to staff assessment</b>  | Was PA done without staff assessment (substitutional) or in addition to staff assessment (supplementary)?                                                                                                                                                                |
|                      |                                      | <input type="checkbox"/> Substitutional<br><input checked="" type="checkbox"/> Supplementary                                                                                                                                                                             |
| <b>10</b>            | <b>Official weight</b>               | Did participation in the PA activity or the grade given by peer(s) contribute to learners' final grades?                                                                                                                                                                 |
|                      |                                      | <input type="checkbox"/> No<br><input type="checkbox"/> Yes-for participation in PA<br><input type="checkbox"/> Yes-for PA grade<br><input checked="" type="checkbox"/> Yes-both (PA & participation)<br><input type="checkbox"/> Other: Click here to add text          |
| <b>11</b>            | <b>Reward</b>                        | Was there a reward for participation in PA?                                                                                                                                                                                                                              |
|                      |                                      | <input checked="" type="checkbox"/> No<br><input type="checkbox"/> Yes-course credit<br><input type="checkbox"/> Yes-incentives (e.g., free time, money, etc.)<br><input type="checkbox"/> Other: Click here to add text                                                 |
| <b>12</b>            | <b>Directionality</b>                | Was the learner assessing another without being assessed (unidirectional) or acting as both assessor and assessee (bidirectional)?                                                                                                                                       |
|                      |                                      | <input type="checkbox"/> Unidirectional<br><input checked="" type="checkbox"/> Bidirectional                                                                                                                                                                             |
| <b>13</b>            | <b>Degree of interactivity</b>       | How did the assessee demonstrate engagement and response to PA?                                                                                                                                                                                                          |
|                      |                                      | <input type="checkbox"/> Reactive: assessee responds to assessor<br><input type="checkbox"/> Reciprocal: same learners assess each other on same task<br><input type="checkbox"/> Negotiated: PA was done more than once on the same task and both parties negotiated it |
| <b>14</b>            | <b>Frequency</b>                     | How often was the PA of the same task done? (Once, twice, etc.)                                                                                                                                                                                                          |
|                      |                                      | Once                                                                                                                                                                                                                                                                     |
| <b>15</b>            | <b>Group constellation</b>           | Did members of the same group assess each other (intragroup) or peers from another group (intergroup) or both?                                                                                                                                                           |
|                      |                                      | <input type="checkbox"/> Intragroup<br><input type="checkbox"/> Intergroup<br><input type="checkbox"/> Both                                                                                                                                                              |
| <b>16</b>            | <b>Constellation assessor</b>        | The number of assessors assigned to each assessee                                                                                                                                                                                                                        |
|                      |                                      | 7                                                                                                                                                                                                                                                                        |
| <b>17</b>            | <b>Constellation assessee</b>        | The number of assessees per assessor                                                                                                                                                                                                                                     |
|                      |                                      | 7                                                                                                                                                                                                                                                                        |
| <b>18</b>            | <b>Unit of assessment (assessor)</b> | At what level did the assessor(s) perform PA? Individual, group, or both?                                                                                                                                                                                                |
|                      |                                      | <input checked="" type="checkbox"/> Individual<br><input type="checkbox"/> Group<br><input type="checkbox"/> Both                                                                                                                                                        |

|                                                                                                                                                                                                                  |                                      |                                                                                                                                                                                                      |                                                                                                                                                                                                                                                                                                                                                                                                                                                                                                                                                                                                                                                                                                                                                                                                                                                                                                                                                                                                                                                                                                                                                                                                                                                                                                                                                                                                                                                                                                                                                              |
|------------------------------------------------------------------------------------------------------------------------------------------------------------------------------------------------------------------|--------------------------------------|------------------------------------------------------------------------------------------------------------------------------------------------------------------------------------------------------|--------------------------------------------------------------------------------------------------------------------------------------------------------------------------------------------------------------------------------------------------------------------------------------------------------------------------------------------------------------------------------------------------------------------------------------------------------------------------------------------------------------------------------------------------------------------------------------------------------------------------------------------------------------------------------------------------------------------------------------------------------------------------------------------------------------------------------------------------------------------------------------------------------------------------------------------------------------------------------------------------------------------------------------------------------------------------------------------------------------------------------------------------------------------------------------------------------------------------------------------------------------------------------------------------------------------------------------------------------------------------------------------------------------------------------------------------------------------------------------------------------------------------------------------------------------|
| <b>19</b>                                                                                                                                                                                                        | <b>Unit of assessment (assessee)</b> | At what level did the assessee(s) experience the PA? Individual, group, or both?                                                                                                                     | <input checked="" type="checkbox"/> Individual<br><input type="checkbox"/> Group<br><input type="checkbox"/> Both                                                                                                                                                                                                                                                                                                                                                                                                                                                                                                                                                                                                                                                                                                                                                                                                                                                                                                                                                                                                                                                                                                                                                                                                                                                                                                                                                                                                                                            |
| <b>20</b>                                                                                                                                                                                                        | <b>Privacy</b>                       | Did assessor and assessee know the identity of each other? (Was PA public, single-blind, or double-blind?)                                                                                           | <input type="checkbox"/> Public<br><input type="checkbox"/> Single-blind (for assessor)<br><input type="checkbox"/> Single-blind (for assessee)<br><input checked="" type="checkbox"/> Double blind (anonymous)<br><input type="checkbox"/> Other: <a href="#">Click here to add text</a>                                                                                                                                                                                                                                                                                                                                                                                                                                                                                                                                                                                                                                                                                                                                                                                                                                                                                                                                                                                                                                                                                                                                                                                                                                                                    |
| <b>21</b>                                                                                                                                                                                                        | <b>Contact</b>                       | Was PA done face-to-face or online? How was the contact between assessor and assessee?                                                                                                               | <input type="checkbox"/> <b>Face-to-face synchronous:</b> same time same place (ST SP)<br><input type="checkbox"/> <b>Online synchronous:</b> same time different place (ST DP), e.g., skype, chat, etc.<br><input checked="" type="checkbox"/> <b>Online asynchronous:</b> different time different place (DT DP), e.g., e-mail, SWoRD, etc.<br><input type="checkbox"/> Other: <a href="#">Click here to add text</a>                                                                                                                                                                                                                                                                                                                                                                                                                                                                                                                                                                                                                                                                                                                                                                                                                                                                                                                                                                                                                                                                                                                                      |
| <b>22</b>                                                                                                                                                                                                        | <b>Matching</b>                      | How were assessor and assessee matched for the PA activity? (e.g., random, skill, self-select, gender, friendship, performance, etc.)                                                                | Random                                                                                                                                                                                                                                                                                                                                                                                                                                                                                                                                                                                                                                                                                                                                                                                                                                                                                                                                                                                                                                                                                                                                                                                                                                                                                                                                                                                                                                                                                                                                                       |
| <b>23</b>                                                                                                                                                                                                        | <b>Format</b>                        | How was the PA guided?                                                                                                                                                                               | <input type="checkbox"/> Freestyle (no instruction provided to learners)<br><input type="checkbox"/> Guided instruction<br><input type="checkbox"/> Guided prompts<br><input checked="" type="checkbox"/> Guided criteria/rubrics<br><input type="checkbox"/> Guided criteria/rubrics and prompts<br><input type="checkbox"/> Other: <a href="#">Click here to add text</a>                                                                                                                                                                                                                                                                                                                                                                                                                                                                                                                                                                                                                                                                                                                                                                                                                                                                                                                                                                                                                                                                                                                                                                                  |
| <b>24</b>                                                                                                                                                                                                        | <b>Training</b>                      | Did the learners receive PA training at any time? If yes, describe the moment in which they received it and the type of training.                                                                    | They received a 1-hour session to prepare them before the peer assessment (they learn how to give effective feedback according th Hattie & Timperley (2007)' framework and they practice peer assessment)                                                                                                                                                                                                                                                                                                                                                                                                                                                                                                                                                                                                                                                                                                                                                                                                                                                                                                                                                                                                                                                                                                                                                                                                                                                                                                                                                    |
| <b>25</b>                                                                                                                                                                                                        | <b>Revision</b>                      | Did learners revise their work after receiving or providing PA?                                                                                                                                      | <input type="checkbox"/> No<br><input checked="" type="checkbox"/> Yes                                                                                                                                                                                                                                                                                                                                                                                                                                                                                                                                                                                                                                                                                                                                                                                                                                                                                                                                                                                                                                                                                                                                                                                                                                                                                                                                                                                                                                                                                       |
| <b>26</b>                                                                                                                                                                                                        | <b>Scope of involvement</b>          | How were learners involved in the PA activity?                                                                                                                                                       | <input type="checkbox"/> Development of assessment criteria<br><input type="checkbox"/> Gave PA only<br><input type="checkbox"/> Received PA only<br><input checked="" type="checkbox"/> Gave and received PA<br><input type="checkbox"/> Additional self-assessment<br><input type="checkbox"/> Other: <a href="#">Click here to add text</a>                                                                                                                                                                                                                                                                                                                                                                                                                                                                                                                                                                                                                                                                                                                                                                                                                                                                                                                                                                                                                                                                                                                                                                                                               |
| <b>Outcomes</b>                                                                                                                                                                                                  |                                      |                                                                                                                                                                                                      |                                                                                                                                                                                                                                                                                                                                                                                                                                                                                                                                                                                                                                                                                                                                                                                                                                                                                                                                                                                                                                                                                                                                                                                                                                                                                                                                                                                                                                                                                                                                                              |
| <b>27</b>                                                                                                                                                                                                        | <b>PA Outcomes</b>                   | <p>These variables are directly measured as outcomes of the PA activity (i.e., why was the PA activity conducted?)</p> <p>Select all the options that apply to your study from the right column.</p> | <input type="checkbox"/> <b>Beliefs &amp; perceptions:</b> including perceptions of learning capacity to perform PA or any perceptions related to the PA processes (e.g., fairness, usefulness), metacognition and self-regulation, attitudes and beliefs (e.g., self-efficacy), teachers' perceptions/conceptions.<br><input type="checkbox"/> <b>Emotions and motivation:</b> emotions experienced by learners (e.g., achievement emotions, social emotions, etc.) & all motivational beliefs (e.g., learning motivation).<br><input checked="" type="checkbox"/> <b>Performance:</b> academic/domain specific performance, achievement, improved draft/work (i.e., revision).<br><input type="checkbox"/> <b>Skills:</b> quality of contribution to the group, professional behaviour, problem solving skills, work habits, interpersonal skills, metacognitive & self-regulatory skills.<br><input type="checkbox"/> <b>Reliability of PA:</b> consistency of PA scores compared to other peer assessors, or PA over several rounds.<br><input type="checkbox"/> <b>Validity of PA:</b> accuracy of PA compared to teachers/tutor/expert's assessment.<br><input checked="" type="checkbox"/> <b>PF content:</b> characteristics of the feedback messages including type, focus, quality, frequency of comments/posts (i.e., participation), etc.<br><input type="checkbox"/> <b>PF processing:</b> Includes implementation, reactions to PF, seeking PF, coping with PF, etc.<br><input type="checkbox"/> Other: <a href="#">Click here to add text</a> |
| <b>Moderators/mediators</b>                                                                                                                                                                                      |                                      |                                                                                                                                                                                                      |                                                                                                                                                                                                                                                                                                                                                                                                                                                                                                                                                                                                                                                                                                                                                                                                                                                                                                                                                                                                                                                                                                                                                                                                                                                                                                                                                                                                                                                                                                                                                              |
| <b>28</b>                                                                                                                                                                                                        | <b>PA Moderators/mediators</b>       | Variables that are not usually manipulated but are taken into account when investigating PA. Select the variables that have been explored in your study from the right column.                       | <input type="checkbox"/> <b>Gender:</b> of assessor/assessee.<br><input type="checkbox"/> <b>Ability &amp; Skills:</b> includes prior knowledge, prior performance, achievement level, GPA, finished high school, previous level of education, year of enrolment, etc.<br><input type="checkbox"/> <b>Skills:</b> reviewing ability, computer skills, etc.<br><input type="checkbox"/> <b>Age:</b> of assessor/assessee.<br><input type="checkbox"/> <b>Culture, ethnicity, nationality or race</b><br><input type="checkbox"/> Other: <a href="#">Click here to add text</a>                                                                                                                                                                                                                                                                                                                                                                                                                                                                                                                                                                                                                                                                                                                                                                                                                                                                                                                                                                                |
| This tool is based on: Alqassab, M., Strijbos, J., Panadero, E., Fernández Ruiz, J., Warren, M., & To, J. (2023). A systematic review of peer assessment design elements. <i>Educational Psychology Review</i> . |                                      |                                                                                                                                                                                                      |                                                                                                                                                                                                                                                                                                                                                                                                                                                                                                                                                                                                                                                                                                                                                                                                                                                                                                                                                                                                                                                                                                                                                                                                                                                                                                                                                                                                                                                                                                                                                              |

Note. PA = peer assessment; PF = peer feedback

<sup>i</sup> For more detailed descriptions refer to the Online Resource 3 by Alqassab et al. (2023) via: [https://osf.io/4jbr3/?view\\_only=9f5b223115f244ac88ac5b054eb21149](https://osf.io/4jbr3/?view_only=9f5b223115f244ac88ac5b054eb21149)

If you have further questions you can contact us: [erlaresearch@gmail.com](mailto:erlaresearch@gmail.com)
