# Supplementary material for: Safe and sound: examining the effect of a training targeting psychological safety and trust in peer assessment
Source: Frontiers journal article supplement (doi:10.3389/feduc.2023.1198011), 2023-06-16
Supplement: Data_Sheet_2.PDF [file Data_Sheet_2.PDF]

## Supplementary materials: students' rubric

| Criteria          | Unsatisfactory                                                                                                                                                                                                                         | Satisfactory                                                                                                                                                                                                                           | Good                                                                                                                                                                                                                                                                          |
|-------------------|----------------------------------------------------------------------------------------------------------------------------------------------------------------------------------------------------------------------------------------|----------------------------------------------------------------------------------------------------------------------------------------------------------------------------------------------------------------------------------------|-------------------------------------------------------------------------------------------------------------------------------------------------------------------------------------------------------------------------------------------------------------------------------|
| Video             | The angle of view and/or the poor resolution make it difficult to understand the situation or the movement OR the movement is very badly executed                                                                                      | 1) The angle of view and the resolution allow a global understanding of the situation AND of the movement AND 2) the movement is correctly executed                                                                                    | 1) The angle of view, the resolution and the quality of technical execution allow an immediate and perfect understanding of the situation and the movement AND 2) The movement is very well executed AND 3) the video is ideally cut: neither too short nor too long.         |
| Diagram           | The understanding of the situation or of the movement is not immediate because the material is not clearly identifiable OR the successive positions of the gymnast are not clear (back? front? L or R profile?) OR are unrealistic     | At first glance, the situation is clearly identifiable and the positions of the gymnast are globally 1) clear (back, face, profile L/R ?) AND 2) realistic (Dimensions of the segments? Position of the head in relation to the arms?) | The understanding of the situation and the movement is immediate, precise and perfect: -the material is represented in its details - the articular positions are physiological and precise- the dimensions of the segments/material do not vary- the movements are realistic. |
| Instructions      | The instruction is missing OR is incorrectly formulated (French/spelling) OR is impersonal OR the instruction describes the movement but does not specify how to perform it.                                                           | The instruction is 1) personal AND 2) qualitative ("when or how to perform the movement to succeed...") AND 3) correctly formulated BUT complex OR not very precise                                                                    | The instruction is 1) personal AND 2) qualitative ("when or how to perform the movement to succeed...") AND 3) formulated very clearly, simple AND precise                                                                                                                    |
| Sucess criteria   | 1) The success criterion is missing OR 2) It is incorrectly formulated (French/spelling) OR 3) There is no link between the criterion and success OR 4) The criterion is difficult to observe                                          | 1) The success criterion is correctly formulated 2) It is relevant (if this criterion is not met the movement is incorrect) 3) It can be easily observed by a non-expert external observer.                                            | 1) Its formulation is correct, clear, simple and precise AND 2) It is relevant (if this criterion is not met, the movement is incorrect) AND 3) It is easily observable by an external observer non-expert and even by the performer himself.                                 |
| Overall coherence | 1) The technique shown on the diagram is clearly incorrect (timing, placement, ... do not match the do not correspond to the video) AND/OR 2) The instructions and/or the criteria for success do not corresponds to the diagram/video | 1) The technique shown on the diagram is correct AND 2) The diagram, the instructions and the success criteria are consistent with each other AND 3) Important start OR end positions are missing from the diagram.                    | 1) The technique shown in the diagram is correct AND 2) The diagram, the instructions and the criteria for success are consistent with each other AND 3) Important start OAND end positions are represented                                                                   |
