# Supplementary material for: Safe and sound: examining the effect of a training targeting psychological safety and trust in peer assessment
Source: Frontiers journal article supplement (doi:10.3389/feduc.2023.1198011), 2023-06-16
Supplement: Data_Sheet_4.PDF [file Data_Sheet_4.PDF]

## Learning situation: Front handspring Handspring against a wall

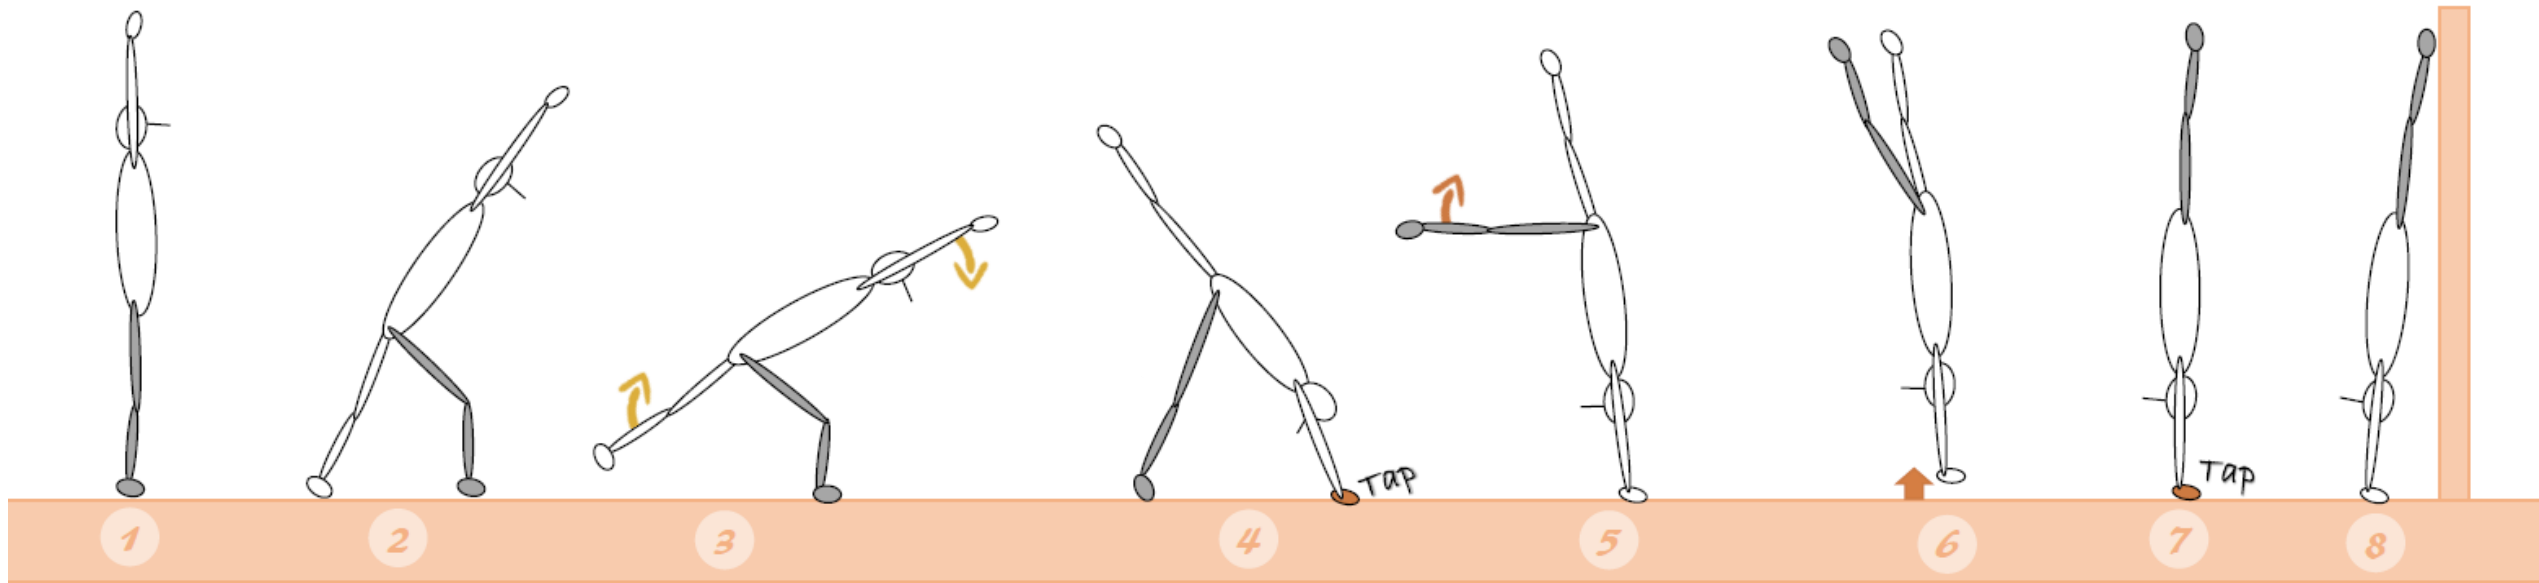

**Instruction :** Keep your whole body aligned (except the dominant leg) throughout the movement

**Success criteria :** Hands lift off the ground as the dominant leg rises to the vertical (see **5** )
